# Supplementary material for: Biomarkers to Guide the Timing of Surgery: Neutrophil and Monocyte L-Selectin Predict Postoperative Sepsis in Orthopaedic Trauma Patients
Source: MDPI journal article supplement (doi:10.3390/jcm10102207), 2021-05-20
Supplement: s1 [file s1]

# Supplementary material

Table S1. Significant differences in cell surface marker expression expressed as fold change of healthy control median MFI

| <b>n 62L</b>    | preop  | postop | 7hrs   | d1      | d3     |
|-----------------|--------|--------|--------|---------|--------|
| non-complicated | 0.71** | 0.78*  | 0.73** | 0.65*** | 0.74*  |
| SIRS            | 0.67*  | 0.74*  | 0.69** | 0.65*   | 0.65** |
| sepsis          | 0.98   | 1.02   | 0.91   | 0.85    | 0.96   |
| MOF             | 0.86   | 0.87   | 0.86   | 0.85    | 0.63   |

  

| <b>m CD62L</b>  | preop  | postop   | 7hrs    | d1      | d3      |
|-----------------|--------|----------|---------|---------|---------|
| non-complicated | 1.18   | 1.37     | 1.33    | 1.28    | 1.25    |
| SIRS            | 1.63   | 1.60**   | 1.66*   | 1.53*   | 1.24    |
| sepsis          | 1.95** | 2.61**** | 2.59*** | 2.54*** | 2.46*** |
| MOF             | 1.95*  | 1.87**   | 2.59**  | 2.24**  | 1.84    |

  

| <b>n CD64</b>   | preop    | postop   | 7hrs     | d1       | d3       |
|-----------------|----------|----------|----------|----------|----------|
| non-complicated | 1.46**** | 1.47**** | 1.68**** | 1.64**** | 1.62**** |
| SIRS            | 1.67**** | 1.68**** | 1.80**** | 1.97**** | 1.87**** |
| sepsis          | 1.56**** | 1.74**** | 1.77**** | 2.25**** | 1.72***  |
| MOF             | 1.64**   | 2.95***  | 3.63***  | 2.26**** | 4.40***  |

  

| <b>m CD64</b>   | preop    | postop   | 7hrs     | d1       | d3       |
|-----------------|----------|----------|----------|----------|----------|
| non-complicated | 1.65**** | 1.71**** | 1.81**** | 1.89**** | 1.83**** |
| SIRS            | 1.40**** | 1.68**** | 1.89**** | 2.04**** | 1.73***  |
| sepsis          | 1.59**** | 1.76**** | 1.87**** | 1.87**** | 1.52**** |
| MOF             | 1.71***  | 1.86**** | 2.16***  | 2.08**** | 1.88***  |

  

| <b>n CD11</b>   | preop | postop | 7hrs  | d1    | d3   |
|-----------------|-------|--------|-------|-------|------|
| non-complicated | 0.92  | 0.98   | 0.92  | 0.96  | 1.07 |
| SIRS            | 0.86  | 0.80*  | 0.76* | 0.75* | 0.89 |
| sepsis          | 0.96  | 0.70*  | 0.96  | 0.76  | 0.92 |
| MOF             | 1.10  | 0.58   | 0.98  | 1.06  | 1.12 |

  

| <b>n CD18</b>   | preop  | postop | 7hrs    | d1     | d3    |
|-----------------|--------|--------|---------|--------|-------|
| non-complicated | 1.29** | 1.32** | 1.50*** | 1.29** | 1.25* |
| SIRS            | 1.09   | 1.18   | 1.15    | 1.19   | 1.39* |
| sepsis          | 1.28*  | 1.17   | 1.30*   | 1.19   | 1.27  |
| MOF             | 1.26   | 1.38   | 1.34*   | 1.38   | 1.49* |

| <b>m CD11</b>   | preop | postop | 7hrs   | d1    | d3     |
|-----------------|-------|--------|--------|-------|--------|
| non-complicated | 1.35* | 1.26   | 1.35** | 1.30* | 1.45** |
| SIRS            | 1.11  | 0.99   | 1.26   | 1.12  | 1.21   |
| sepsis          | 1.19  | 1.13   | 1.35*  | 1.15  | 1.26** |
| MOF             | 1.04  | 0.92   | 1.12   | 1.16  | 1.28   |

  

| <b>n CD181</b>  | preop  | postop  | 7hrs     | d1       | d3      |
|-----------------|--------|---------|----------|----------|---------|
| non-complicated | 0.77** | 0.77**  | 0.79**   | 0.77**   | 0.73**  |
| SIRS            | 0.66** | 0.76*** | 0.70**** | 0.70**** | 0.64*** |
| sepsis          | 0.76   | 0.75**  | 0.77**   | 0.80     | 0.70**  |
| MOF             | 0.61*  | 0.60    | 0.70*    | 0.66*    | 0.71*   |

Significant differences between healthy controls and clinical subgroups are denoted by, \*=p<0.05, \*\* = p<0.01, \*\*\*p<0.001, \*\*\*\* = p<0.0001.

Table S2. Multivariate regression results for postop sepsis using neutrophil I-selectin, monocyte I-selectin or CRP at all perioperative timepoints.

| <b>Variable</b>             | <b>OR</b> | <b>95% CI</b>    | <b>P value</b> |
|-----------------------------|-----------|------------------|----------------|
| Age                         | 0.98      | 0.9398 to 1.026  | 0.4551         |
| Sex                         | 0.22      | 0.01039 to 1.515 | 0.1879         |
| ISS                         | 1.16      | 1.089 to 1.275   | <0.0001        |
| time from injury            | 1.01      | 0.9973 to 1.019  | 0.1153         |
| admission bd                | 0.96      | 0.8069 to 1.131  | 0.6204         |
| neutrophil I-selectin preop | 1.56      | 1.159 to 2.190   | 0.0051         |

| <b>Variable</b>              | <b>OR</b> | <b>95% CI</b>    | <b>P value</b> |
|------------------------------|-----------|------------------|----------------|
| Age                          | 0.99      | 0.9542 to 1.034  | 0.7686         |
| Sex                          | 0.27      | 0.01361 to 1.719 | 0.2403         |
| ISS                          | 1.15      | 1.078 to 1.243   | 0.0001         |
| time from injury             | 1.01      | 1.001 to 1.020   | 0.0248         |
| admission bd                 | 0.99      | 0.8354 to 1.174  | 0.9234         |
| neutrophil I-selectin postop | 1.27      | 1.003 to 1.624   | 0.0486         |

| <b>Variable</b> | <b>OR</b> | <b>95% CI</b> | <b>P value</b> |
|-----------------|-----------|---------------|----------------|
|-----------------|-----------|---------------|----------------|

|                            |      |                   |        |
|----------------------------|------|-------------------|--------|
| Age                        | 1.00 | 0.9567 to 1.038   | 0.8928 |
| Sex                        | 0.22 | 0.008148 to 1.612 | 0.2179 |
| ISS                        | 1.14 | 1.073 to 1.241    | 0.0002 |
| time from injury           | 1.01 | 1.001 to 1.021    | 0.0234 |
| admission bd               | 0.99 | 0.8318 to 1.164   | 0.8594 |
| neutrophil I-selectin 7hrs | 1.38 | 1.066 to 1.789    | 0.0109 |

| Variable                   | OR   | 95% CI           | P value |
|----------------------------|------|------------------|---------|
| Age                        | 0.99 | 0.9544 to 1.033  | 0.7578  |
| Sex                        | 0.23 | 0.01133 to 1.496 | 0.1948  |
| ISS                        | 1.15 | 1.076 to 1.240   | 0.0001  |
| time from injury           | 1.01 | 0.9991 to 1.019  | 0.0556  |
| admission bd               | 0.96 | 0.8144 to 1.136  | 0.6637  |
| neutrophil I-selectin 1day | 1.24 | 0.9334 to 1.583  | 0.1073  |

| Variable                     | OR   | 95% CI           | P value |
|------------------------------|------|------------------|---------|
| Age                          | 0.99 | 0.9415 to 1.034  | 0.62    |
| Sex                          | 0.39 | 0.01896 to 2.786 | 0.4122  |
| ISS                          | 1.17 | 1.090 to 1.294   | 0.0002  |
| time from injury             | 1.01 | 0.9998 to 1.022  | 0.046   |
| admission bd                 | 1.00 | 0.8284 to 1.207  | 0.9974  |
| neutrophil I-selectin 3 days | 1.48 | 1.143 to 2.030   | 0.0058  |

| Variable                  | OR   | 95% CI             | P value |
|---------------------------|------|--------------------|---------|
| Age                       | 0.98 | 0.9380 to 1.030    | 0.5074  |
| Sex                       | 0.13 | 0.005801 to 0.9879 | 0.0921  |
| ISS                       | 1.15 | 1.077 to 1.263     | 0.0003  |
| time from injury          | 1.01 | 1.001 to 1.023     | 0.0264  |
| admission bd              | 0.92 | 0.7491 to 1.112    | 0.4085  |
| monocyte I-selectin preop | 1.50 | 1.207 to 1.979     | 0.001   |

| Variable | OR   | 95% CI          | P value |
|----------|------|-----------------|---------|
| Age      | 1.00 | 0.9530 to 1.047 | 0.9986  |

|                          |      |                  |        |
|--------------------------|------|------------------|--------|
| Sex                      | 0.30 | 0.01460 to 2.199 | 0.3027 |
| ISS                      | 1.16 | 1.084 to 1.276   | 0.0002 |
| time from injury         | 1.01 | 1.004 to 1.026   | 0.0081 |
| admission bd             | 1.05 | 0.8582 to 1.282  | 0.655  |
| monocyte l-selectin post | 1.50 | 1.219 to 1.994   | 0.0009 |

| Variable                 | OR   | 95% CI           | P value |
|--------------------------|------|------------------|---------|
| Age                      | 0.99 | 0.9446 to 1.035  | 0.6782  |
| Sex                      | 0.53 | 0.02583 to 3.849 | 0.5784  |
| ISS                      | 1.15 | 1.071 to 1.249   | 0.0004  |
| time from injury         | 1.01 | 1.001 to 1.022   | 0.0244  |
| admission bd             | 1.06 | 0.8729 to 1.305  | 0.5532  |
| monocyte l-selectin 7hrs | 1.45 | 1.181 to 1.865   | 0.0013  |

| Variable                  | OR   | 95% CI           | P value |
|---------------------------|------|------------------|---------|
| Age                       | 0.99 | 0.9458 to 1.034  | 0.6642  |
| Sex                       | 0.39 | 0.01849 to 2.996 | 0.431   |
| ISS                       | 1.15 | 1.075 to 1.265   | 0.0005  |
| time from injury          | 1.01 | 0.9950 to 1.018  | 0.184   |
| admission bd              | 0.97 | 0.8102 to 1.167  | 0.778   |
| monocyte l-selectin 1 day | 1.27 | 1.071 to 1.555   | 0.0107  |

| Variable                  | OR   | 95% CI            | P value |
|---------------------------|------|-------------------|---------|
| Age                       | 0.98 | 0.9251 to 1.032   | 0.4739  |
| Sex                       | 0.23 | 0.008433 to 2.061 | 0.2575  |
| ISS                       | 1.19 | 1.097 to 1.348    | 0.0005  |
| time from injury          | 1.01 | 0.9926 to 1.018   | 0.3217  |
| admission bd              | 1.20 | 0.9417 to 1.633   | 0.1762  |
| monocyte l-selectin 3 day | 1.57 | 1.211 to 2.253    | 0.0032  |

| Variable | OR   | 95% CI          | P value |
|----------|------|-----------------|---------|
| Age      | 1.00 | 0.9566 to 1.035 | 0.8302  |

|                  |      |                  |        |
|------------------|------|------------------|--------|
| Sex              | 0.24 | 0.01229 to 1.537 | 0.2047 |
| ISS              | 1.14 | 1.071 to 1.229   | 0.0002 |
| time from injury | 1.01 | 0.9985 to 1.018  | 0.0726 |
| admission bd     | 1.01 | 0.8392 to 1.202  | 0.9515 |
| CRP pre          | 1.01 | 0.9989 to 1.014  | 0.0949 |

| Variable         | OR   | 95% CI           | P value |
|------------------|------|------------------|---------|
| Age              | 1.01 | 0.9616 to 1.049  | 0.8359  |
| Sex              | 0.37 | 0.01797 to 2.656 | 0.3921  |
| ISS              | 1.15 | 1.079 to 1.267   | 0.0003  |
| time from injury | 1.01 | 0.9981 to 1.020  | 0.0799  |
| admission bd     | 1.00 | 0.8273 to 1.213  | 0.9728  |
| CRP 1 day        | 1.01 | 0.9994 to 1.015  | 0.0593  |

| Variable         | OR   | 95% CI           | P value |
|------------------|------|------------------|---------|
| Age              | 1.00 | 0.9586 to 1.037  | 0.9134  |
| Sex              | 0.23 | 0.01178 to 1.493 | 0.195   |
| ISS              | 1.14 | 1.075 to 1.234   | 0.0001  |
| time from injury | 1.01 | 0.9989 to 1.018  | 0.0629  |
| admission bd     | 1.00 | 0.8316 to 1.190  | 0.9814  |
| CRP 3 days       | 1.01 | 0.9972 to 1.017  | 0.1398  |
